# Supplementary material
Source: PubMed Central journal article supplement (PMC8297678)
Supplement: BLT-19-292_Online_Supplementary_Content.pdf [file BLT-19-292_Online_Supplementary_Content.pdf]

**ONLINE SUPPLEMENTARY CONTENT**

**Table SI - Baseline characteristics of the 87 patients**

|                                       |                       |
|---------------------------------------|-----------------------|
| <b>Male/female</b>                    | 53 (60.9%)/34 (39.1%) |
| <b>Age</b>                            |                       |
| At the beginning of follow-up, months | 3 (IQR: 1-60)         |
| At first transfusion, years           | 3 (IQR: 1-6)          |
| <b>Patients &lt;18 years</b>          | 84 (96.6%)            |
| <b>Transfused elsewhere</b>           | 39 (44.8%)            |
| <b>Demographic origin</b>             |                       |
| African                               | 65 (74.7%)            |
| Latin-American                        | 19 (21.8%)            |
| European                              | 2 (2.3%)              |
| Asian                                 | 1 (1.2%)              |
| <b>HbS phenotype</b>                  |                       |
| HbSS                                  | 83 (95.4%)            |
| HbSβ                                  | 3 (3.4%)              |
| HbSC                                  | 1 (1.1%)              |
| <b>Therapeutics</b>                   |                       |
| Hydroxyurea                           | 74 (85.1%)            |
| Iron chelation                        | 23 (26.4%)            |
| Splenectomy                           | 10 (11.5%)            |
| SCT                                   | 32 (36.8%)            |
| Chronic transfusion therapy           | 52 (59.8%)            |
| Erythrocytapheresis                   | 13 (14.9%)            |

HbS: S hemoglobin; SCT: Stem-cell transplantation.

**Table SII - RBC serologic antigen frequencies**

|              |               |
|--------------|---------------|
| <b>ABO</b>   |               |
| O            | 41/87 (47.1%) |
| A            | 22/87 (25.3%) |
| B            | 19/87 (21.8%) |
| AB           | 5/87 (5.7%)   |
| <b>Rh</b>    |               |
| D            | 80/87 (92%)   |
| C            | 31/86 (36%)   |
| c            | 83/86 (96.5%) |
| E            | 16/86 (18.6%) |
| e            | 84/86 (97.7%) |
| <b>Kell</b>  |               |
| K            | 1/86 (1.2%)   |
| <b>Duffy</b> |               |
| Fya          | 9/69 (13%)    |
| Fyb*         | 9/27 (33.3%)  |
| <b>Kidd</b>  |               |
| Jka          | 59/66 (89.4%) |
| Jkb*         | 12/27 (44.4%) |
| <b>MNS</b>   |               |
| S            | 25/65 (38.5%) |
| s*           | 16/17 (94.1%) |

\*Be aware that these antigens were only studied in a small proportion of the patients
